# Supplementary figures and images for: Prenatal Nicotine Exposure and Risk of Schizophrenia Among Offspring in a National Birth Cohort
Source: Atypon-hosted journal article supplement (doi:10.1176/appi.ajp.2016.15060800), 2016-05-24

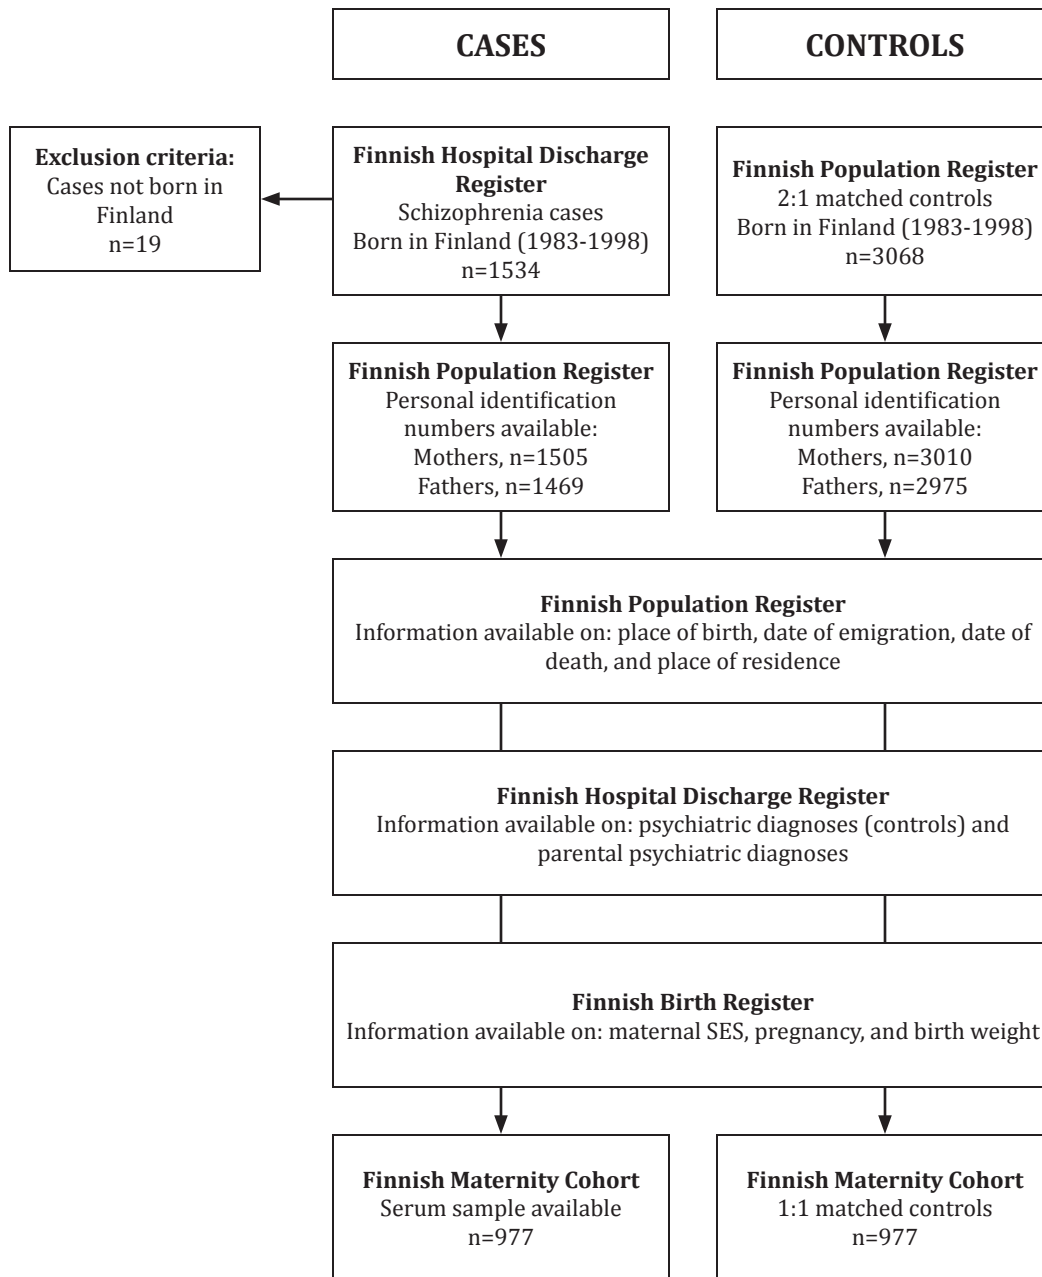

**Figure S1.** Flowchart of the study

Supplement: appi.ajp.2016.15060800.ds001.pdf [file appi.ajp.2016.15060800.ds001.pdf]
